# Supplementary material
Source: PubMed Central journal article supplement (PMC5831165)

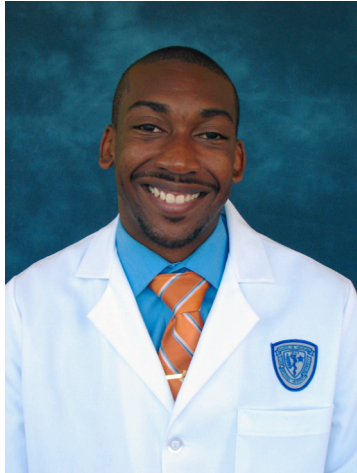

**DaShawn Hickman** received his B.S. in Biomedical Engineering from Yale University in 2009, his M.S. in Biomedical Engineering from Case Western Reserve University in 2017 and is pursuing his Ph.D. (Pathology) and MD at Case Western Reserve University School of Medicine in the laboratory of Prof. Anirban Sen Gupta. His current research focuses on small and large animal model evaluation of synthetic hemostatic nanotechnologies, as well as, the design and characterization of trauma site-selective delivery of hemostasis-augmenting drugs for hemorrhage control in emergency (e.g. trauma) scenarios.

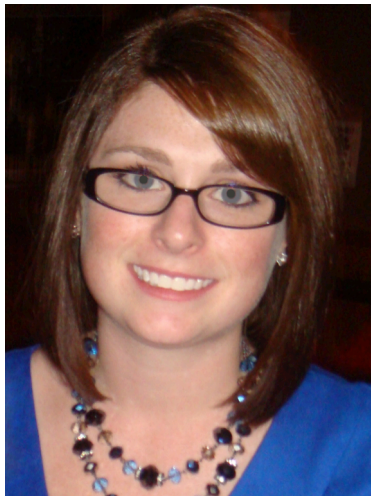

**Christa L. Pawlowski, PhD** is a post-doctoral researcher with in the laboratory of Prof. Anirban Sen Gupta in the Department of Biomedical Engineering at Case Western Reserve University (CWRU). Dr. Pawlowski received her B.S. in Biomedical Engineering in 2011 and PhD in Biomedical Engineering in 2015, both from CWRU, in the area of platelet-inspired biomaterials technologies for hemostasis and targeted drug delivery applications. Her current research focus is on the pre-clinical evaluation of platelet-inspired biomaterials-based synthetic hemostat nanotechnologies with a vision for clinical translation for potential application in transfusion medicine as a platelet surrogate in hemorrhage control.

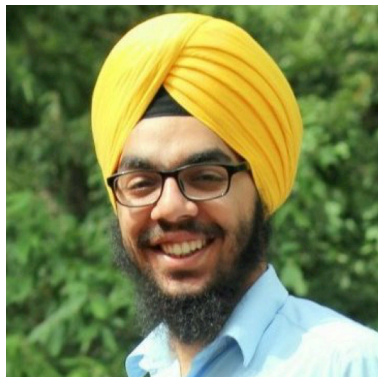

**Ujjal DS Sekhon** received his B.E. in Biotechnology Engineering from Panjab University in 2014 and is currently pursuing his Ph.D. in Biomedical Engineering in the laboratory of Prof. Anirban Sen Gupta in the Department of Biomedical Engineering at Case Western Reserve University. His current research focus is on the development and evaluation of enzyme-responsive polymeric biomaterials and technologies for hemostasis, wound healing and drug delivery applications.

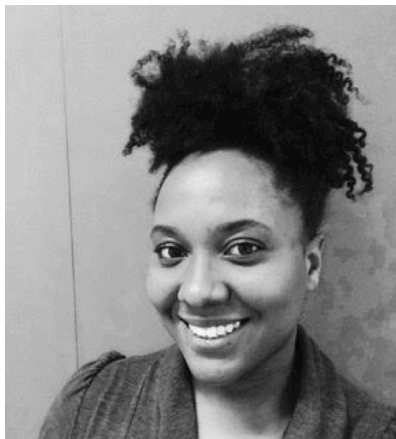

**Joyann Marks, PhD** is a Postdoctoral Research Associate in the laboratory of Prof. Anirban Sen Gupta in the Department of Biomedical Engineering at Case Western Reserve University. Joyann received her Bachelor's degree in Chemistry from Fisk University in 2010 and her Ph.D. in Polymer Science and Engineering from the laboratory of Prof. Kevin Edgar at Virginia Tech in 2015. Her research interests include oral drug delivery, polymeric hydrogels for hemostasis and targeted drug delivery and carbohydrate systems for biomaterials applications.

**Anirban Sen Gupta, PhD** is Associate Professor of Biomedical Engineering at Case Western Reserve University and the Director of Bio-inspired Engineering for Advanced Technologies (BEAT) Laboratory. Dr. Sen Gupta received his B.Sc. (Honors) in Chemistry in 1995 and B.Tech. in Chemical Engineering in 1998 from University of Calcutta (Kolkata, India), and his M.S. and PhD in Chemical Engineering from The University of Akron (Ohio) in 2003. Dr. Sen Gupta's expertise is in the area of polymeric biomaterials, blood-biomaterial interactions, targeted drug delivery and nanomedicine. His laboratory's current research is in hemostatic biomaterials and technologies, targeted drug delivery in cardiovascular and cancer pathologies, and enzyme-responsive polymers for wound healing applications.

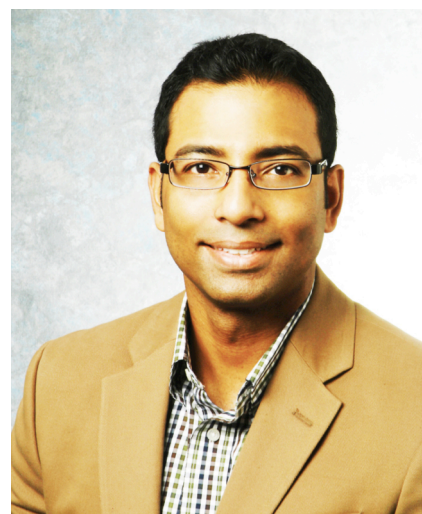

Supplement: NIHMS937185-supplement-Supporting_Information.pdf [file NIHMS937185-supplement-Supporting_Information.pdf]
